# Supplementary material
Source: PubMed Central journal article supplement (PMC2713603)
Supplement: NIHMS84004-supplement-01.pdf [file NIHMS84004-supplement-01.pdf]

## AID Is Required for the Chromosomal Breaks in *c-myc* that Lead to

### *c-myc/IgH* Translocations

Davide F. Robbiani, Anne Bothmer, Elsa Callen, Bernardo Reina-San-Martin, Yair Dorsett, Simone Difilippantonio, Daniel J. Bolland, Hua Tang Chen, Anne E. Corcoran, André Nussenzweig, and Michel C. Nussenzweig

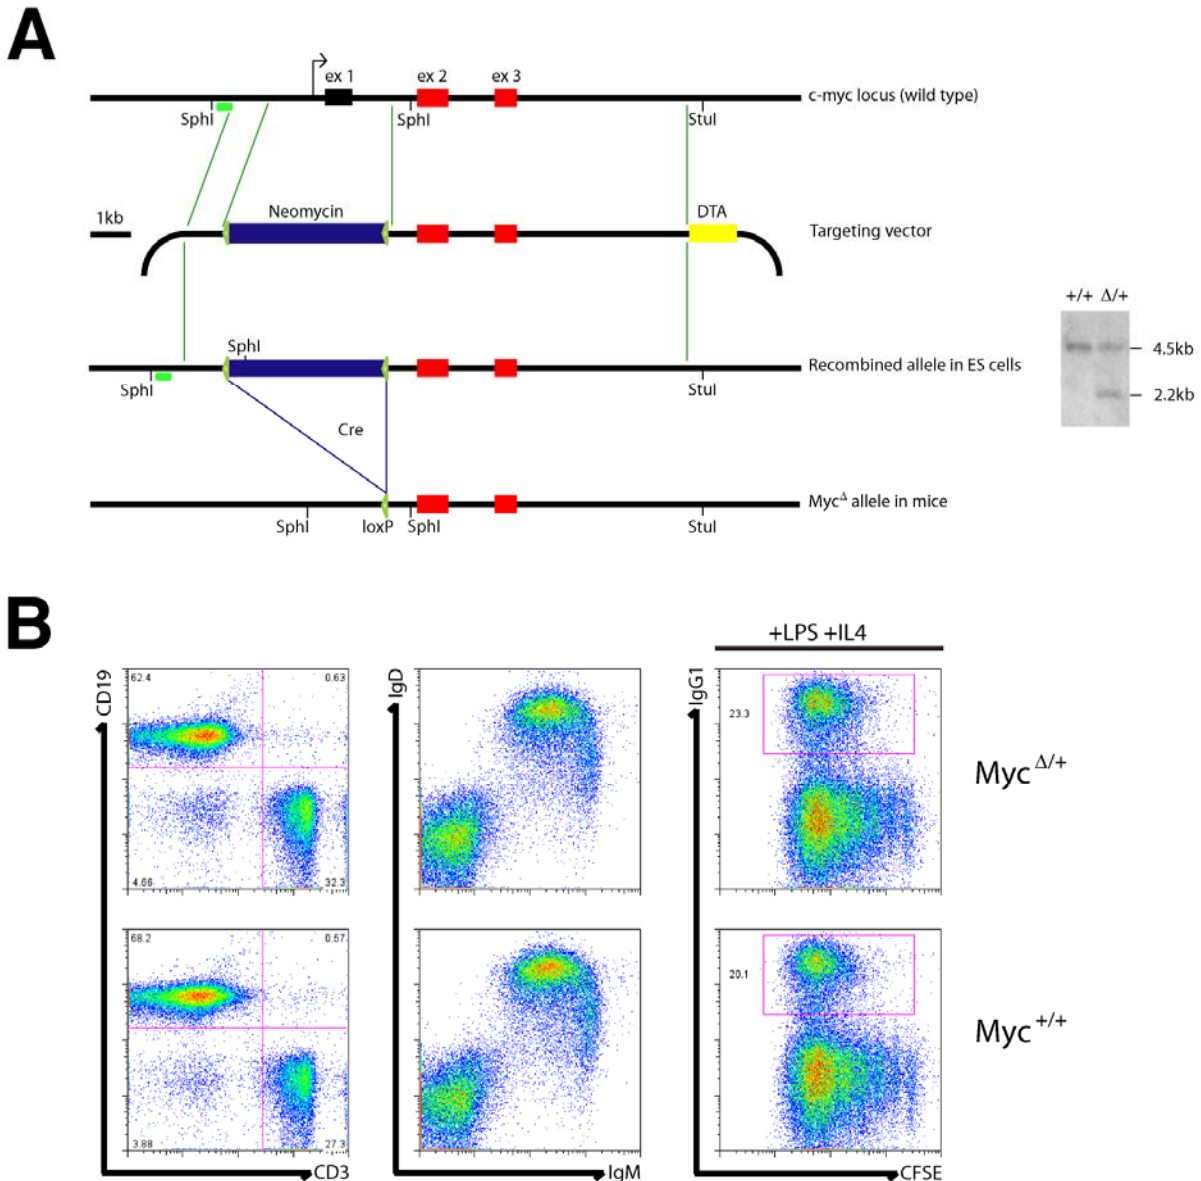

**Figure S1. Knock-out strategy for the *Myc*<sup>Δ</sup> allele.**

(A) Targeting strategy is shown along with the genomic structure of the wild type murine *c-myc* locus, the targeting vector, the recombined allele in ES cells and in mice after removal of the neomycin-based ACN cassette (Bunting et al., 1999). Southern blot analysis of ES cell genomic DNA digested with SphI revealed proper integration upon hybridization with

**Cell, Volume 135**

a radiolabeled probe (PCR product of 5-CATTCTGACTCCTTTTGCCC-3 and 5-TCAGAGGTGGCTATTCAGTTGC-3), yielding fragments of the indicated sizes. Diphtheria toxin A (DTA) was used for negative selection. The following primers were used for generating the targeting vector: short arm of homology, 5-GGCGCGCCTCACAAATCCGAGAGCCACAAC-3 and 5-GGCCGGCCTGCGCAGTCCAGTAA-3; long arm of homology, 5-TTAATTAACACCCAGTGCTGAATCGCTGC-3 and 5-GCGGCCGCCACCACTCTGTAGGAAATGCC-3. For genotyping, 35 cycles of PCR (95C, 45 s; 59C, 45 s; and 72C, 2 min) were performed with primers 5-GTGAAAACCGACTGTGGCCCTGGAA-3, 5-GGGGAGGGGGTGTCAAATAATAAGA-3 and 5-CAACCGCAGATGAGGTCTATGC-3. The size of the wild type allele is 0.4 kb, the  $Myc^{\Delta}$  allele is 0.3 kb. (B) Flow cytometric analysis of splenocytes from age-matched wild type ( $Myc^{+/+}$ ) and mutant ( $Myc^{\Delta/+}$ ) mice reveals normal B lymphocyte development and activation in  $Myc^{\Delta/+}$  mice. Immuno-staining was performed with the indicated markers on total spleen cells (left and center panels) or on LPS and IL-4 activated B cells labeled with CFSE to track cell division (right panels). Representative of three independent experiments.

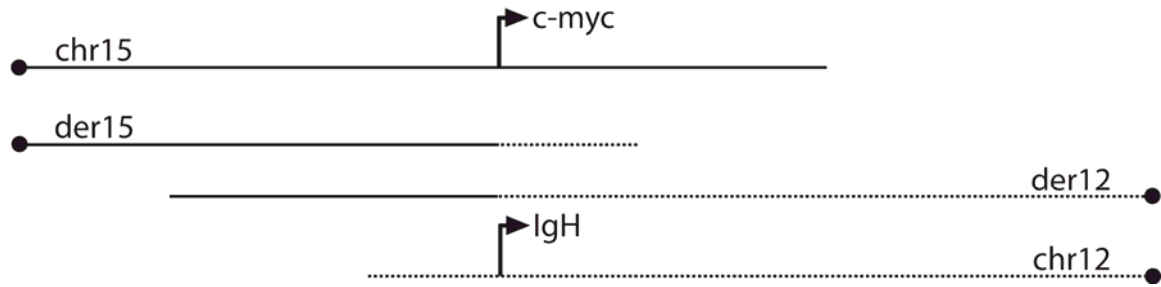

**Figure S2. Diagram of balanced *c-myc/IgH* translocation.**

Schematic representation of mouse chromosome 15 with *c-myc* transcribing towards the telomere and chromosome 12 with *IgH* transcribing towards the centromere. Centromeres are symbolized by circles. The derivative chromosomes der12 and der15, products of the balanced *c-myc/IgH* translocation, are also shown.

**A**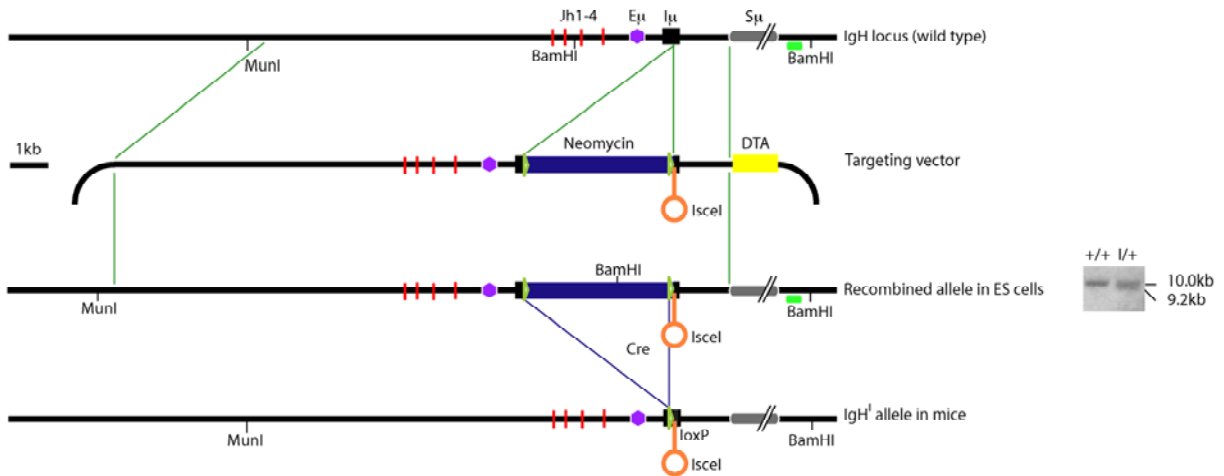**B**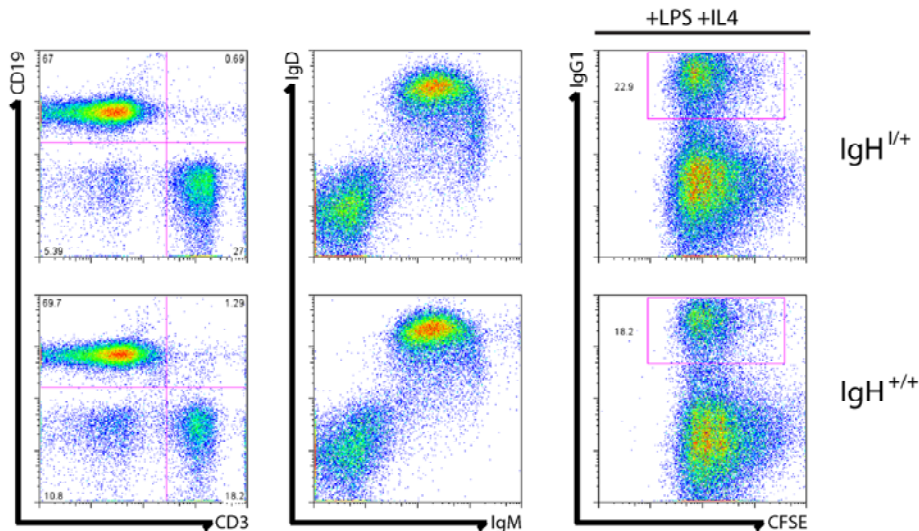

### Figure S3. Knock-in strategy for the $IgH^I$ allele.

(A) The targeting strategy is shown along with the genomic structure of the wild type murine *IgH* locus, the targeting vector, the recombined allele in ES cells and in mice after removal of the neomycin-based ACN cassette (Bunting et al., 1999). Southern blot analysis of ES cell genomic DNA digested with BamHI revealed proper integration upon hybridization with a radiolabeled probe (PCR product of 5'-AAATGAGGAAGGCTGAGCAAGG-3 and 5'-AGGAAGGTGGGTTATGTTGGGG-3), yielding fragments of the indicated sizes. Diphtheria toxin A (DTA) was used for negative selection. The following primers were used for generating the targeting vector and introducing the I-SceI recognition sequence: long arm of homology, 5'-GGCGCGCCGATGAGAGCAGTGTAGGTCTATGGG-3 and 5'-GGCCGGCCCAGAAGCCACAACCATACATTCC-3; short arm of homology, 5'-GCGGCCGCAGTTACGCTAGGGATAACAGGGTAATATAGCCACCCATCCACCTGCTGC-3 (I-SceI site is underlined) and 5'-GCGGCCGCATTCCAGTTTGGCTCATCTCG-3. For genotyping, 35 cycles of PCR (95C, 45 s; 56C, 45 s; and 72C, 30 s) were performed with primers 5'-TGGGAATGTATGGTTGTGGCTTC-3 and

**Cell, Volume 135**

5-GGAGAGGTCCAGAGTCTTTGTGTG-3. The size of the wild type allele is 0.1 kb, the IgH<sup>I</sup> allele is 0.25 kb. (B) Flow cytometric analysis of spleen cells from age-matched wild type (IgH<sup>+/+</sup>) and mutant (IgH<sup>I/+</sup>) mice reveals normal B lymphocyte development and activation in IgH<sup>I/+</sup> mice. Immuno-staining was performed with the indicated markers on total spleen cells (left and center panels) or on LPS and IL-4 activated B cells labeled with CFSE to track cell division (right panels). Representative of two independent experiments.

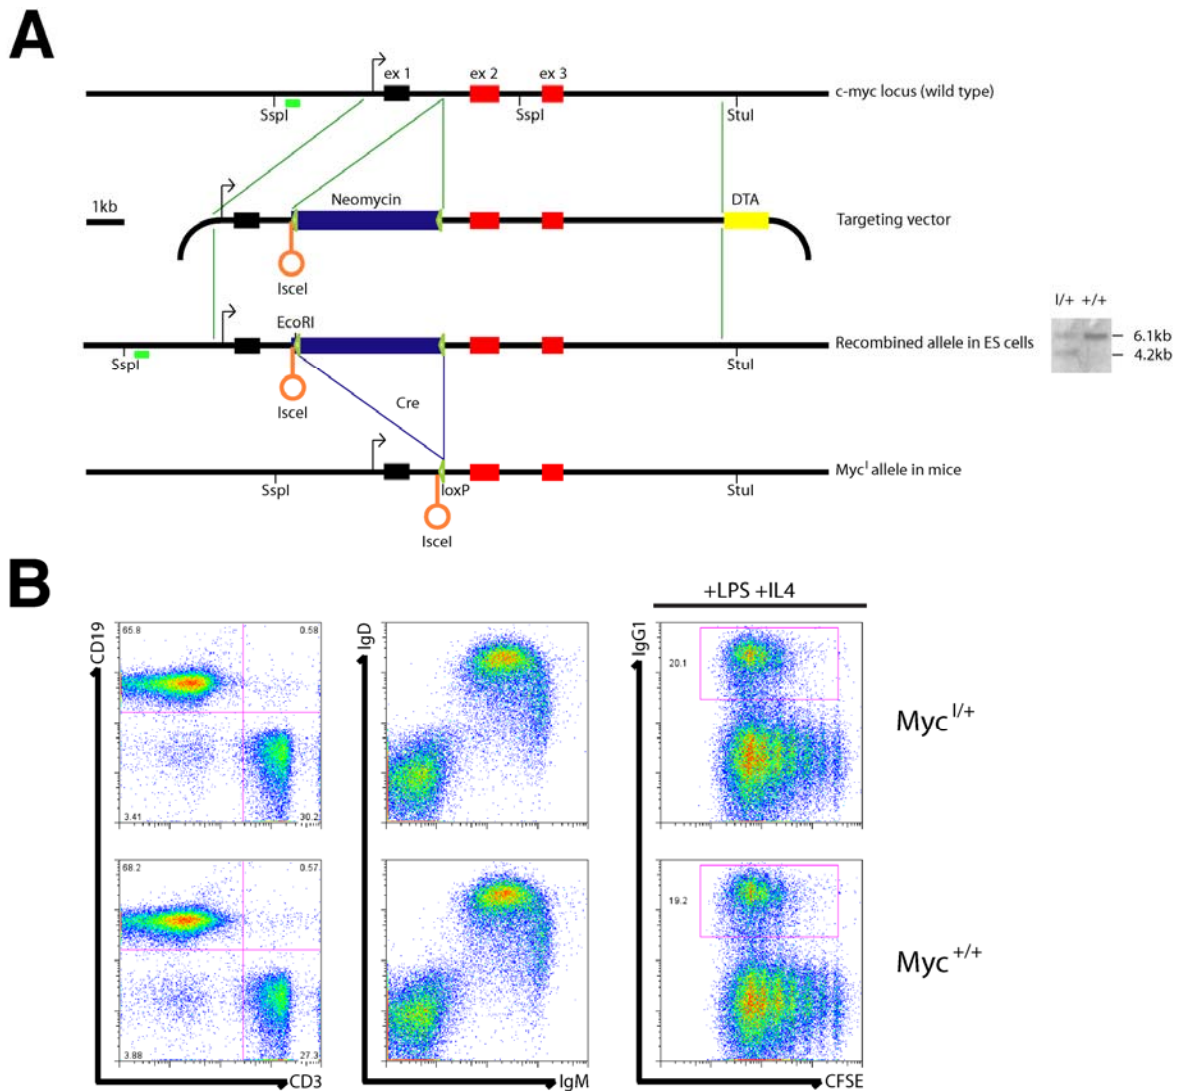

**Figure S4. Knock-in strategy for the  $Myc^I$  allele.**

(A) The targeting strategy is shown along with the genomic structure of the wild type murine *c-myc* locus, the targeting vector, the recombined allele in ES cells and in mice after removal of the neomycin-based ACN cassette (Bunting et al., 1999). Southern blot analysis of ES cell genomic DNA digested with *SspI* revealed proper integration upon hybridization with a radiolabeled probe (PCR product of 5-CATTCTGACTCCTTTTGCCC-3 and 5-TCAGAGGTGGCTATTCAGTTGC-3), yielding fragments of the indicated sizes. Diphtheria toxin A (DTA) was used for negative selection. The following primers were used for generating the targeting vector and introducing the I-SceI recognition sequence: short arm of homology, 5- GGCCGGCCGGGAGACCTACAGGGGAAAGAGCCG-3 and 5-GGCCGGCCATTACCCTGTTATCCCTACAGGGCGTCTTCCCTCTCCCCG-3 (I-SceI site is underlined); long arm of homology, 5-TTAATTAACACCCAGTGCTGAATCGCTGC-3 and 5-GCGGCCGCCACCACTCTGTAGGAAATGCC-3. For genotyping, 35 cycles of PCR (95C, 45 s; 58C, 45 s; and 72C, 45 s) were performed with primers 5-TTGGGGGAAACCAGAGGGAATCC-3 and 5-GGGAGGGGGTGTCAAATAATAAGAG-3. The size of the wild type allele is 0.25 kb, the  $Myc^I$  allele is 0.35 kb. (B) Flow cytometric analysis of spleen cells from age-

**Cell, Volume 135**

matched wild type (Myc<sup>+/+</sup>) and mutant (Myc<sup>I/+</sup>) mice reveals normal B lymphocyte development and activation in Myc<sup>I/+</sup> mice. Immuno-staining was performed with the indicated markers on total spleen cells (left and center panels) or on LPS and IL-4 activated B cells labeled with CFSE to track cell division (right panels). Representative of two independent experiments.

**A**

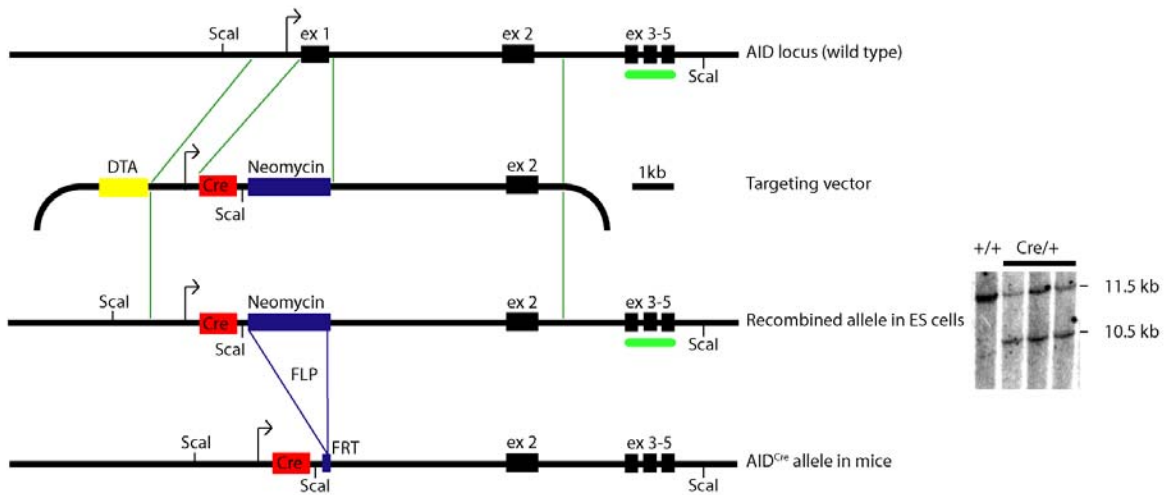

**B**

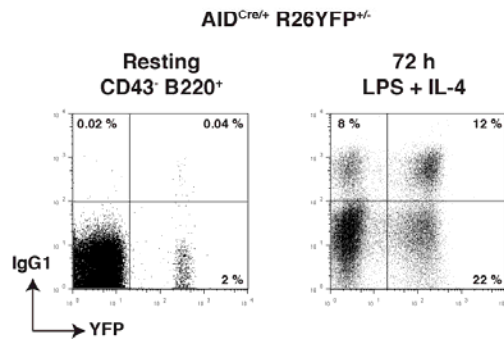

**Figure S5. Targeted insertion of Cre recombinase into the mouse *aicda* locus ( $AID^{Cre/+}$  mice).**

The targeting strategy is shown along with the genomic structure of the wild type murine *aicda* locus, the targeting vector, the recombined allele in ES cells and in mice after germline deletion of the selection cassette by crossing with FLP<sup>er</sup> mice. The inserted Cre recombinase DNA contains a nuclear localization signal, an SV40 T-antigen intron and an HSV thymidine kinase polyA signal. Expression of the neomycin resistance gene is driven by the PGK promoter. To increase the frequency of targeting, the neomycin DNA lacked a polyA and included the splice donor sequence of AID's exon 2. Southern blot analysis of ES cell genomic DNA digested with ScaI revealed proper integration upon hybridization with a radiolabeled probe (amplified with primers 5-CTGGCTGCCACGTGGAATTGTTG-3 and 5-TCCCAACATACGAAATGCATCTC-3), yielding fragments of the indicated sizes. Diphtheria toxin A (DTA) was used for negative selection. The following primers were used for generating the targeting vector: short arm of homology, 5-ATAAGAATGCGGCCGCACATTCAGAGCAAGCCGCAGTGGTG-3 and 5-CCTTAATTAATAGTACTCCAAATCTCAGGACAAGTCAAGGC-3; long arm of homology, 5-CCATTAATTAAGCAGAGCTAGAGCCGGCTTGTGGTAATAAC-3 and 5-GGCGCGCCGTGACTGTAATAACTGCAATCGTAATAGG-3; Cre recombinase DNA, combined PCR with the products of 5-GGCATAAAACTGAGTGTAACAAACGGAAGGAAC-3 and 5-



**Cell, Volume 135**

GACACCTTCCTCTTCTTCTTGGGCATATCGGTCTCCAGCGTGACTTTCTTG-3 with  
5-CAAGAAAGTCACGCTGGAGACCGATATGCCCAAGAAGAAGAGGAAGGTGTC-  
3 and 5-

CCTTAATTAATACGCGTCGATCGAGTACTCGACCGAACAAACGACCCAACAC-3.

The frt-flanked Neomycin cassette was removed in vivo by crossing to FLPer mice (a gift by Dr. Susan Dymecki (Rodriguez et al., 2000)). For genotyping, 35 cycles of PCR (95C, 45 s; 57C, 45 s; and 72C, 1 min) were performed with primers

5-GGACCCAACCCAGGAGGCAGATGT-3,

5-CACTCGTTGCATCGACCGGTAATG-3 and

5-CCTCTAAGGCTTCGCTGTTATTACCAC-3. The wild type allele is 0.5 kb, the AID<sup>Cre</sup>

allele is 0.3 kb. (B) Flow cytometric analysis of splenic B cells from AID<sup>Cre/+</sup>, ROSA26-

STOP-YFP<sup>+/-</sup> (Srinivas et al., 2001) mice prior and after stimulation with LPS and IL-4

shows regulated activity of Cre.

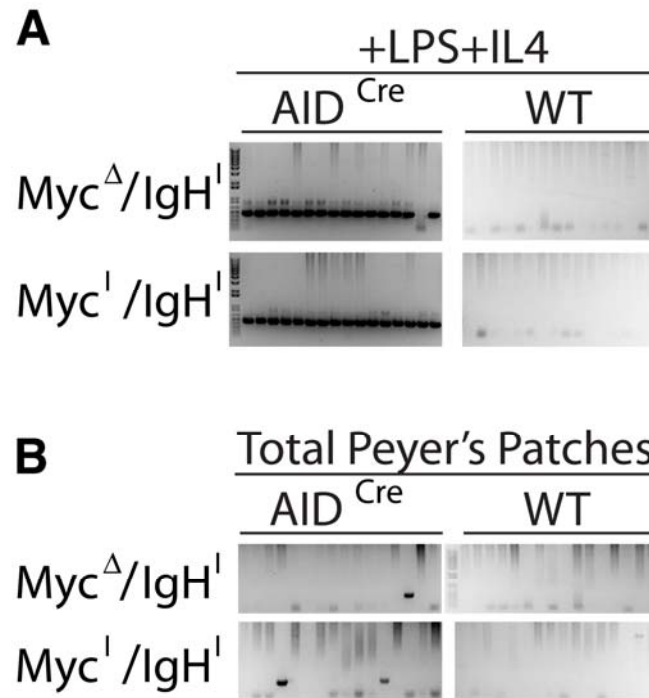

**Figure S6. AID<sup>Cre</sup> mediated translocations *in vivo*.**

(A) Agarose gel with 0.5 kb PCR products corresponding to precise loxP-to-loxP *c-myc/IgH* translocations (as verified by sequencing). B cells of the indicated genotypes were stimulated with LPS and IL-4. 100,000 cells were assayed in each lane. (B) Agarose gel with 0.5 kb PCR products corresponding to precise loxP-to-loxP *c-myc/IgH* translocations (as verified by sequencing). DNA from total Peyer's Patches from mice with the indicated genotypes were analyzed. 100,000 cells were assayed in each lane.

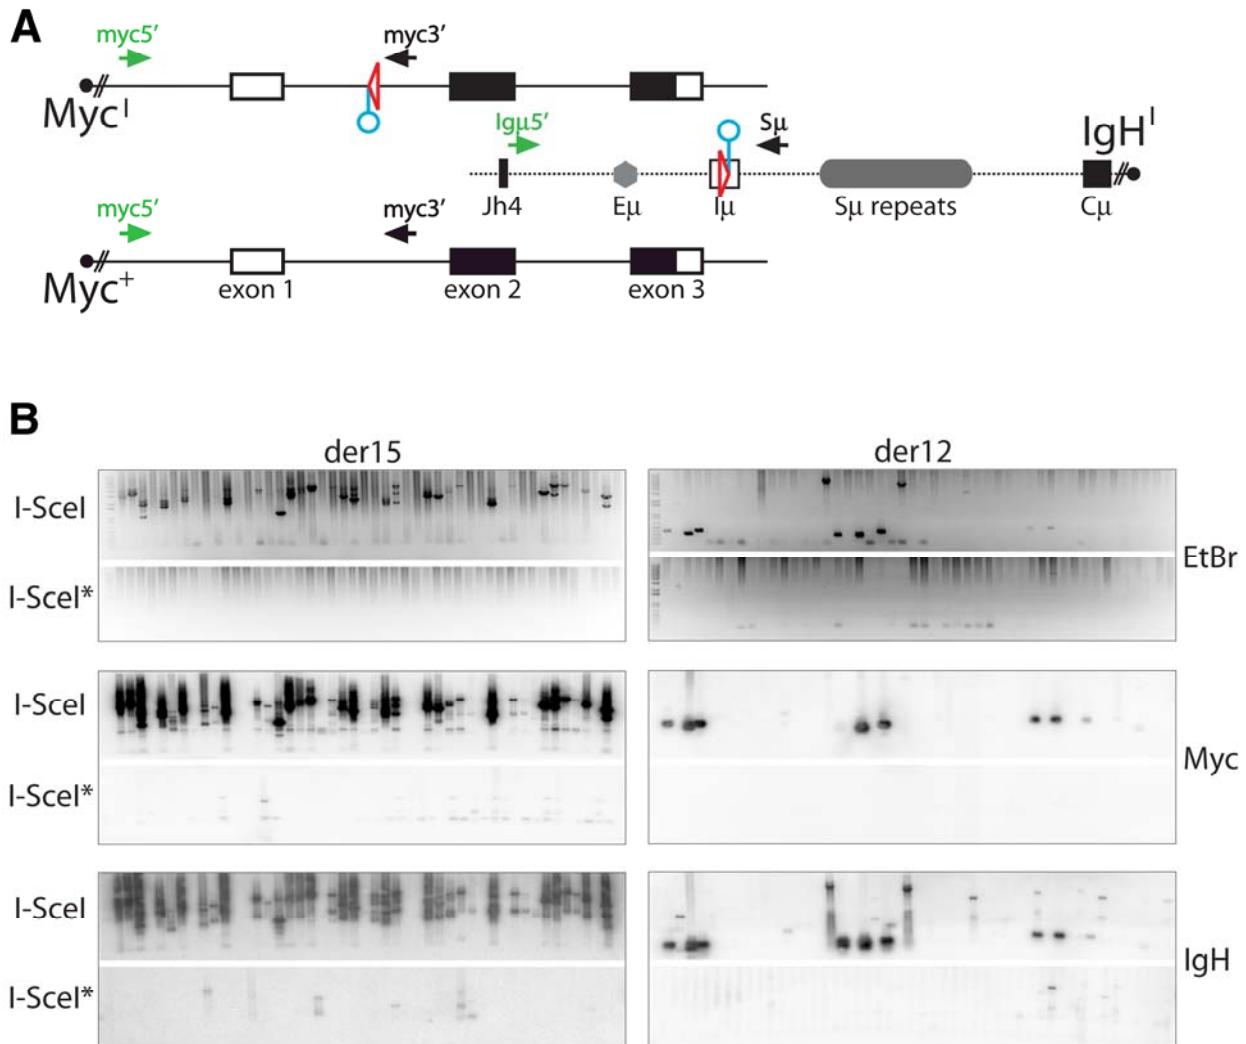

**Figure S7. I-SceI induced translocations in AID deficient B lymphocytes: Southern Blot.**

(A) Schematic representation of the  $Myc^l$ ,  $Myc^+$  and  $IgH^l$  alleles with the PCR primers for detecting der12 and der15 *c-myc/IgH* translocations. Circles point to recognition sequences for I-SceI. (B) I-SceI rescues translocation in the absence of AID. Representative ethidium bromide (EtBr) stained agarose gels from Figure 4B were Southern blotted and oligo-probed for *c-myc* and *IgH*, as indicated, to verify translocations.

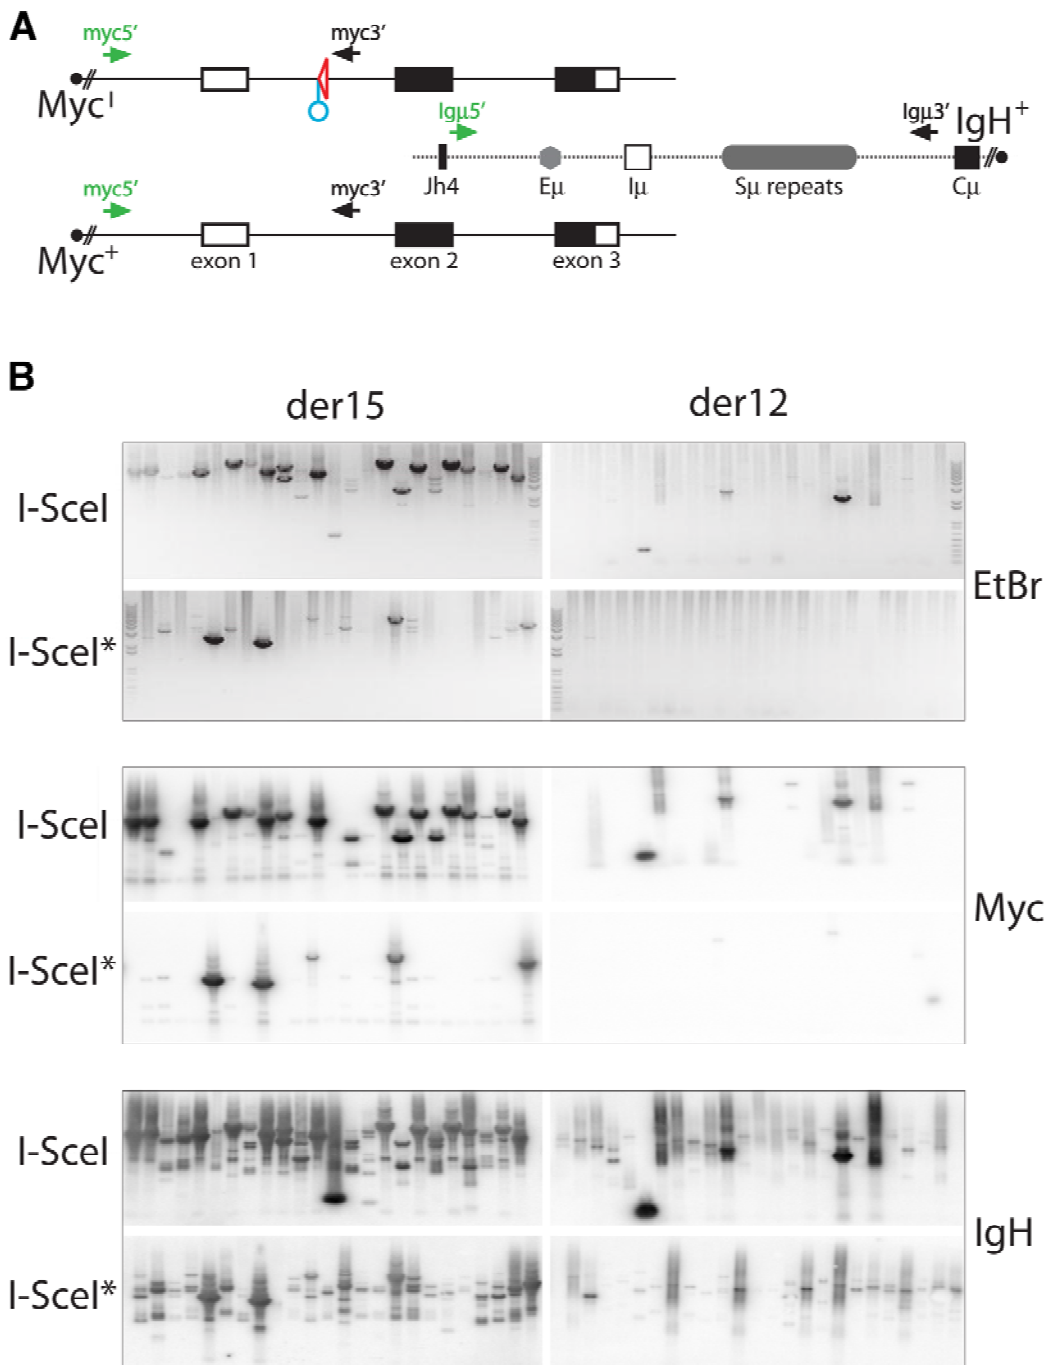

**Figure S8. I-SceI mediated translocations in  $Myc^{I/+}$ , AID proficient B lymphocytes: Southern Blot.**

(A) Schematic representation of the  $Myc^I$ ,  $Myc^+$  and  $IgH^+$  alleles with the PCR primers for detecting der12 and der15  $c-myc/IgH$  translocations. Circles point to recognition sequences for I-SceI. (B) I-SceI mediated translocations in the presence of AID. Representative ethidium bromide (EtBr) stained agarose gels from Figure 5B were Southern blotted and oligo-probed for  $c-myc$  and  $IgH$ , as indicated, to verify translocations.  $Myc^{I/+}$  B cells were stimulated with LPS and IL-4 and infected with retroviruses encoding I-SceI or I-SceI\* control. 100,000 cells were assayed in each lane.

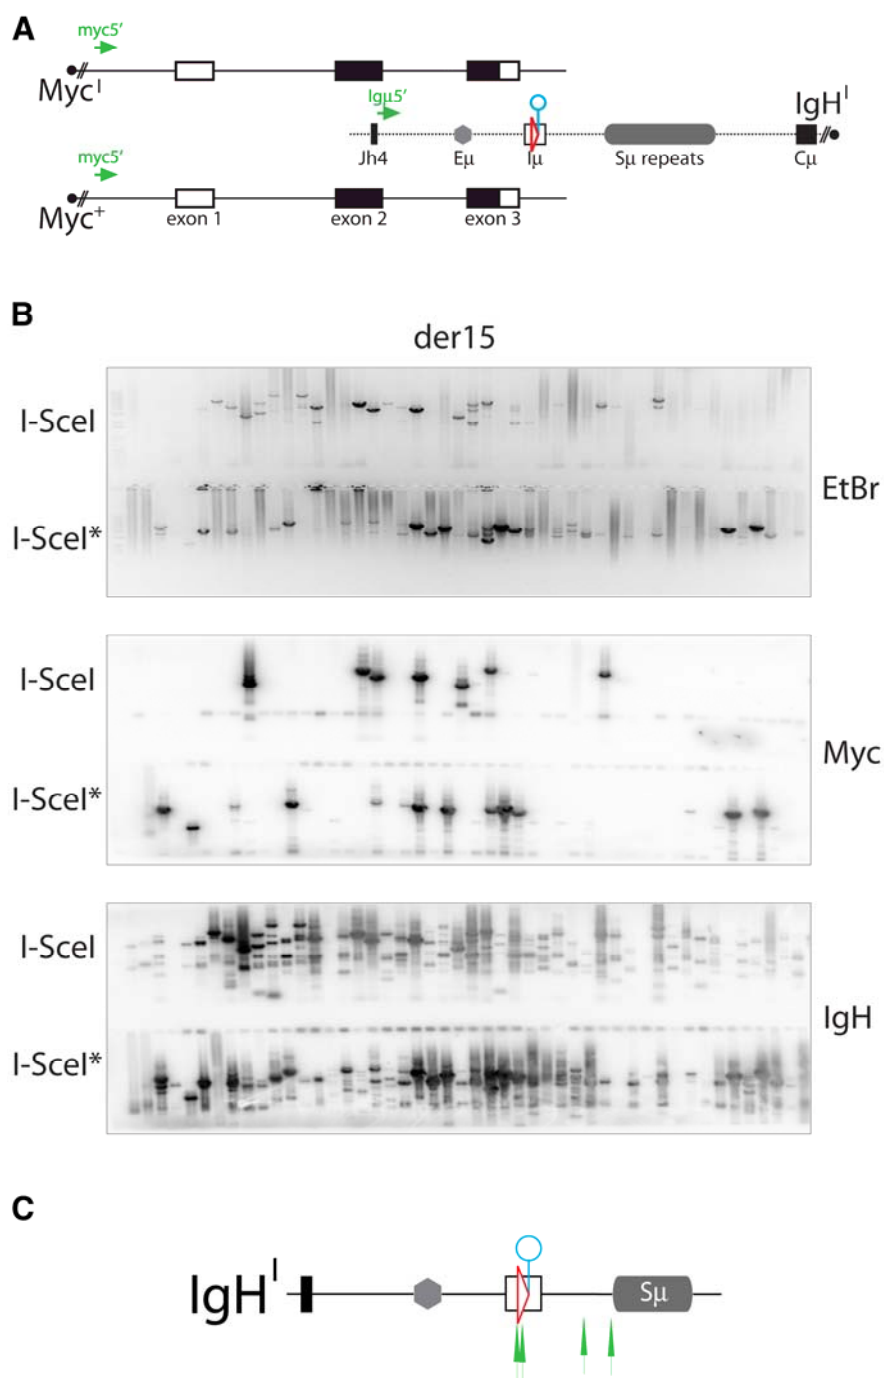

**Figure S9. I-SceI mediated translocations in *IgH*<sup>I/+</sup>, AID proficient B lymphocytes.** (A) Schematic representation of the *Myc*<sup>+</sup> and *IgH*<sup>I</sup> alleles with the PCR primers for detecting der15 *c-myc/IgH* translocations. Circles point to recognition sequences for I-SceI. (B) I-SceI mediated translocations in the presence of AID. Representative ethidium bromide (EtBr) stained agarose gel with PCR products corresponding to *c-myc/IgH* translocations was Southern blotted and oligo-probed for *c-myc* and *IgH*, as indicated, to identify translocations. *IgH*<sup>I/+</sup> B cells were stimulated with LPS and IL-4 and infected with retroviruses encoding I-SceI or I-SceI\* control. 100,000 cells were assayed in each lane. Two independent experiments. (C) Map of translocation breakpoints from stimulated *IgH*<sup>I/+</sup> B cells infected with I-SceI. Arrows point to *c-myc/IgH* der15 breakpoints at the *IgH*<sup>I</sup> allele.

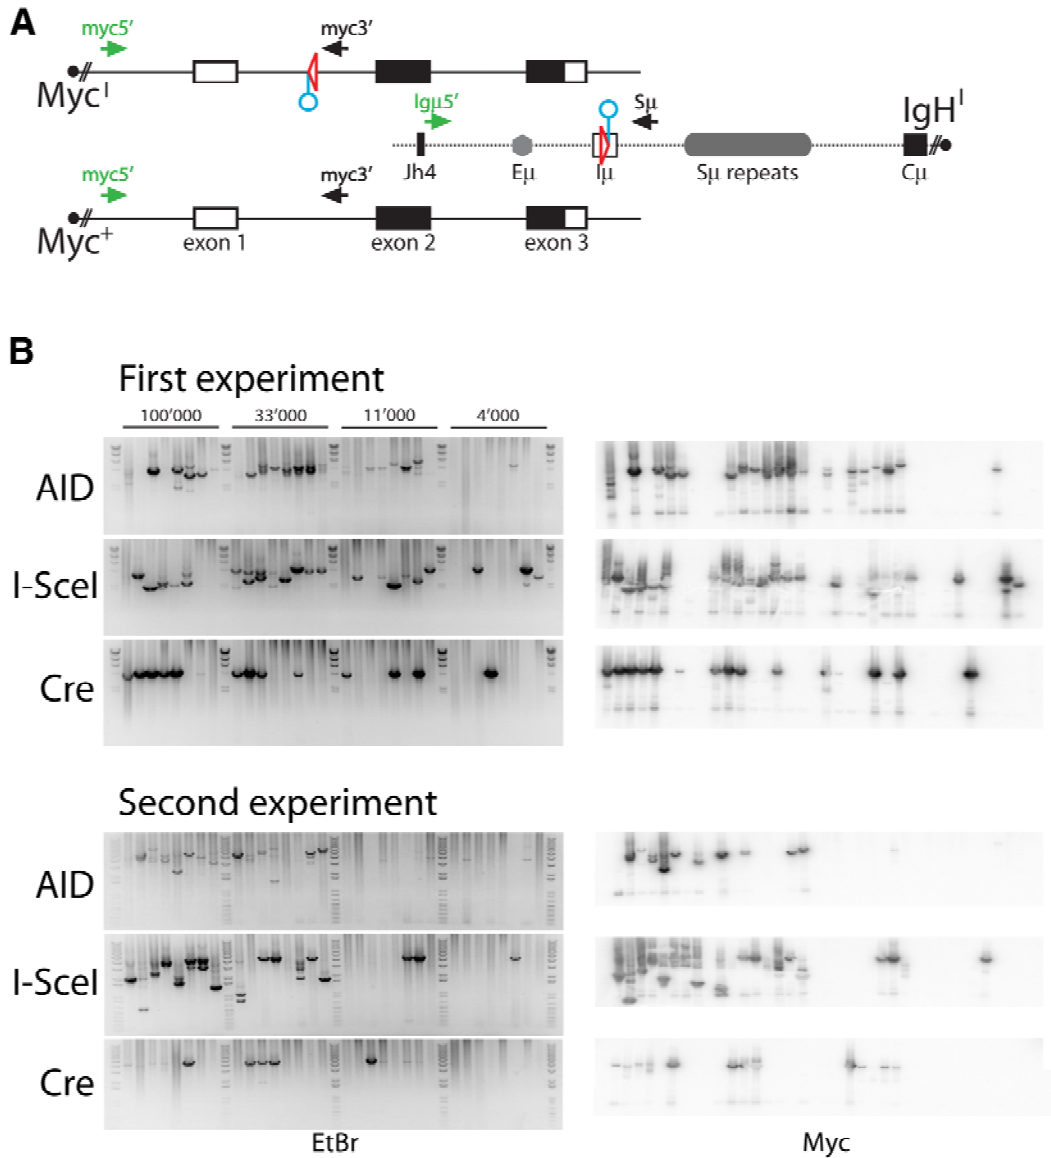

**Figure S10. Comparing translocations by retroviral AID, I-SceI and Cre in AID<sup>-/-</sup> cells: Southern Blot.**

(A) Schematic representation of the *Myc*<sup>l</sup>, *Myc*<sup>+</sup> and *IgH*<sup>l</sup> alleles with the PCR primers for detecting der15 *c-myc/IgH* translocations. Triangles represent loxP sites, circles point to recognition sequences for I-SceI. (B) AID, I-SceI, or Cre mediated translocations in the absence of AID. Ethidium bromide (EtBr) stained agarose gels from two independent experiments were blotted and oligo-probed for *c-myc*, as indicated, to identify translocations (see also figure 6B).

**Table S1. Summary of mutation data in *c-myc*.**

| <b>Genotype</b>    | <b>Retrovirus</b> | <b>Frequency of unique mutations<sup>1</sup></b>  | <b>Mutations at C/G (%)<sup>2</sup></b> | <b>Transitions at C/G (%)<sup>3</sup></b> |
|--------------------|-------------------|---------------------------------------------------|-----------------------------------------|-------------------------------------------|
| Wild type          | -                 | 0.3 x 10 <sup>-4</sup> (87'890) <sup>4</sup>      | 33.3                                    | 100                                       |
| AID <sup>-/-</sup> | AID               | 1.2 x 10 <sup>-4</sup> (101'541) <sup>5</sup>     | 66.7                                    | 75                                        |
| AID <sup>-/-</sup> | empty             | <0.07 x 10 <sup>-4</sup> (136'800) <sup>4,5</sup> | -                                       | -                                         |

<sup>1</sup> Frequency of unique mutations (number of analyzed nucleotides).

<sup>2</sup> Percentage of mutations at C or G.

<sup>3</sup> Percentage of C or G mutations that are transitions.

<sup>4</sup> p = 0.08 with Student's T-Test.

<sup>5</sup> p = 0.0005 with Student's T-Test.

**Table S2. Translocation breakpoints from *Myc*<sup>l/+</sup> *IgH*<sup>l/+</sup> *AID*<sup>-/-</sup> B cells infected with I-SceI.** 50 nucleotides surrounding each breakpoint are shown, with the homology to germline sequence indicated by vertical bars. I-SceI site sequences are highlighted in blue, insertions are green, microhomologies are yellow. Shaded in light grey are extended microhomologies if single nucleotide gaps are tolerated. Numbers on the right indicate the distance in base pairs between the breakpoint and the center of the corresponding I-SceI allele. The top 8 sequences are from der12, the remaining 13 from der15 translocations.

|                         |                                                                     |      |
|-------------------------|---------------------------------------------------------------------|------|
| <i>Myc</i> <sup>l</sup> | AGTTATAAGCTTTCGCGAGCTCGAA <b>TCCGA</b> TCCGAATTCTTAATTAACAC         | 75   |
| 285-1                   | GGCTTACCATTGCGGTGCCTGGTT <b>TCCGA</b> TCCGAATTCTTAATTAACAC          |      |
| <i>IgH</i> <sup>l</sup> | GGCTTACCATTGCGGTGCCTGGTT <b>TCCGA</b> GAGGTCCAGAGTCTTTGTGT          | 95   |
| <i>Myc</i> <sup>l</sup> | <b>TAACAGGGTAAT</b> GGCCGGCCCAAGG <b>G</b> CGAATTCATAACTTCGTATAATGT | 22   |
| 285-3                   | GTGCCTGGTTTCGGAGAGGT <b>CCAGA</b> GCGAATTCATAACTTCGTATAATGT         |      |
| <i>IgH</i> <sup>l</sup> | GTGCCTGGTTTCGGAGAGGT <b>CCAGA</b> GCTTTGTGTGGAATTGTTCCCTTCA         | 84   |
| <i>Myc</i> <sup>l</sup> | <b>ACAGGGTAAT</b> GGCCGGCCCAAGGCGAATTCATAACTTCGTATAATGT             | 24   |
| 285-4                   | AATTGTTTCCTTCAAAG <b>ATTAATTA</b> GAATTCATAACTTCGTATAATGT           |      |
| <i>IgH</i> <sup>l</sup> | AATTGTTTCCTTCAAAGCCACCGAGGCTGGCTGGTCCATGAGCAGCCAGG                  | 57   |
| <i>Myc</i> <sup>l</sup> | GAAGACGCCCTG <b>TAGGGATAACAGG</b> GTAATGGCCGGCCCAAGGGCGAAT          | 4    |
| 285-7                   | GGTGGATGGGTGGCTAT <b>ATTACCCT</b> GTAATGGCCGGCCCAAGGGCGAAT          |      |
| <i>IgH</i> <sup>l</sup> | GGTGGATGGGTGGCTAT <b>ATTACCCT</b> G <b>TATCCCTA</b> GCGTAACTGCGGCC  | -1   |
| <i>Myc</i> <sup>l</sup> | TTAACACCCAGTGTGAATCGCTGC <b>AGGGT</b> CTCTGGTGCAGTGGCGTGC           | 118  |
| 285-8                   | TGGAATTGTTTCCTTCAAAGCCACCG <b>AGGGT</b> CTCTGGTGCAGTGGCGTCA         |      |
| <i>IgH</i> <sup>l</sup> | TGGAATTGTTTCCTTCAAAGCCACCG <b>AGGCT</b> GGCTGGTCCATGAGCAGCC         | 48   |
| <i>Myc</i> <sup>l</sup> | TTCGCGAGCTCGAATCGGATCCGAAT <b>TCTTAATTAACACCCAGT</b> GCTGA          | 86   |
| 285-9                   | TGGATGGGTGGCTAT <b>ATTACCCTGT</b> TCTTAATTAACACCCAGT <b>GCTGA</b>   |      |
| <i>IgH</i> <sup>l</sup> | TGGATGGGTGGCTAT <b>ATTACCCTGT</b> <b>TATCCCTA</b> GCGTAACTGCGGCCG   | -2   |
| <i>Myc</i> <sup>l</sup> | CTTCGTATAATGTATGCTATACGAAG <b>GTTAT</b> AAGCTTTCGCGAGCTCGAAT        | 51   |
| 285-10                  | GGTGGATGGGTGGCTAT <b>ATTACCCT</b> <b>GTTAT</b> AAGCTTTCGCGAGCTCGAAT |      |
| <i>IgH</i> <sup>l</sup> | GGTGGATGGGTGGCTAT <b>ATTACCCT</b> <b>GTTATCCCTA</b> GCGTAACTGCGGCCG | -4   |
| <i>Myc</i> <sup>l</sup> | <b>ACAGGGTAAT</b> GGCCGGCCCAAGGG <b>GA</b> AATTCATAACTTCGTATAATGTAT | 24   |
| 299-2                   | AAGCCACCGAGGCTGGCTGGTCCAT <b>GA</b> AATTCATAACTTCGTATAATGTAT        |      |
| <i>IgH</i> <sup>l</sup> | AAGCCACCGAGGCTGGCTGGTCCAT <b>GAG</b> CAGCCAGGTGGATGGGTGGCTA         | 33   |
| <i>Myc</i> <sup>l</sup> | CAAAAGGCAGATTCACCCCCCC <b>CC</b> CACACACACTCCAGCACCTCCGG            | 2178 |
| 299-5                   | TCTAGAGCTAGCGGCCGAGTT <b>CC</b> CACACACACTCCAGCACCTCCGG             |      |
| <i>IgH</i> <sup>l</sup> | TCTAGAGCTAGCGGCCGAGTT <b>CC</b> <b>TAGGGATAACAGGGTAAT</b> ATAGCC    | 10   |
| <i>Myc</i> <sup>l</sup> | GCTCCGGGTGTAAACAGTAATAG <b>GC</b> AGCATGAATTAAGTGCAGCGCCCG          | 1632 |
| 299-8                   | CTCTGTGTGAACTCCCTCTGGCCCT <b>GC</b> AGCATGAATTAAGTGCAGCGCCCG        |      |
| <i>IgH</i> <sup>l</sup> | CTCTGTGTGAACTCCCTCTGGCCCT <b>GC</b> TATTGTTGAATGGCCAAAGGT           | 231  |



**Cell, Volume 135**

|                  |                                                                       |      |
|------------------|-----------------------------------------------------------------------|------|
| Myc <sup>I</sup> | GCAGGAGGGGAGCTGAGTGAGGCGA <b>GTCGGACC</b> CGGCAGCTGAGAGCAGC           | 1365 |
| 299-11           | TGGGAATGTATGGTTGTGGCTTCTG <b>GTCGGACC</b> CGGCAGCTGAGAGCAGC           |      |
| IgH <sup>I</sup> | TGGGAATGTATGGTTGTGGCTTCTG <b>GGCCGGCC</b> GAATTCGGATCCGATTC           | 124  |
| Myc <sup>I</sup> | GAACGAATGAGTTATCTAGGAGCC <b>CCGCT</b> CAGTGTGTGGAGTGATAGAG            | 1910 |
| 1212-1           | GCTTCTGGGCCGGCCGAATTCGGAT <b>CCGCT</b> CAGTGTGTGGAGTGATAGAG           |      |
| IgH <sup>I</sup> | GCTTCTGGGCCGGCCGAATTCGGAT <b>CCGAT</b> TCGAGCTCGCGAAAGCTTAT           | 104  |
| Myc <sup>I</sup> | CCTT <b>TTGGT</b> CGTACAGTTAT <b>GTGGACTGGG</b> CACATFCTTTCCAGAACGACC | 2104 |
| 1212-2           | CCCTCTGGCCCTGCTTAT <b>GTGGAA</b> TGGGCACATFCTTTCCAGAACGACC            |      |
| IgH <sup>I</sup> | CCCTCTGGCCCTGCTTAT <b>GTGGAA</b> TGGGC <b>CAAAGG</b> CTCTGAGACCAGGCT  | 211  |
| Myc <sup>I</sup> | GGGGTGTAACAGTAATAGCGCAGC <b>ATGAAT</b> TAACTGCGCGCCCGACCAT            | 1637 |
| 1212-4           | CGTATAGCATAcATTATACGAAGTT <b>ATGAAT</b> TAACTGCGCGCCCGACCAT           |      |
| IgH <sup>I</sup> | CGTATAGCATAcATTATACGAAGTT <b>ATGAAT</b> CTTAATTAATCTAGAGCT            | 46   |
| Myc <sup>I</sup> | CGCCCAGCCATTTTCTCTTGCTCGC <b>CGCTAG</b> TCCTTTCCCTTTCTGTAC            | 1678 |
| 1212-15          | AAGTTATGAATTCTTAATTAATCTA <b>GAGCTAG</b> TCCTTTCCCTTTCTGTAC           |      |
| IgH <sup>I</sup> | AAGTTATGAATTCTTAATTAATCTA <b>GAGCTAG</b> CGGCCGAGTTACG <b>CTAG</b>    | 25   |
| Myc <sup>I</sup> | ATAAAGGGCGGGTGGCGGGGATTA <b>GCCAGAGA</b> ATCTCTCTTTCTCCCTT            | 1456 |
| 1212-16          | ATCTAGAGCTAGCGGCCGAGTTAC <b>GCTAGAGA</b> ATCTCTCTTTCTCCCTT            |      |
| IgH <sup>I</sup> | ATCTAGAGCTAGCGGCCGAGTTAC <b>GCTAGGGA</b> <b>TAAcAGGGTAAT</b> ATAGC    | 7    |
| Myc <sup>I</sup> | ATTAGCCAGAGAATCTCTCTTTCT <b>CCCT</b> TCCCCACCTCTCTATTTTTT             | 1474 |
| 1212-17          | NTGGACTTTGGGTCTCCACCCAG <b>ACT</b> TCCCCACCTCTCTATTTTTT               |      |
| IgH <sup>I</sup> | CTGGACTTTGGGTCTCCACCCAG <b>ACT</b> GGGAATGTATGGTTGTGGCTTC             | 149  |
| Myc <sup>I</sup> | GGTCTATGCAGGAAAACGATGTCTGGAATTTTATTAAAATTGCTCAGCA                     | 1982 |
| 1212-18          | TTNNNNGCCAGTCCACATGCTCTGT <b>AA</b> ATTTTATTAAAATTGCTCAGCA            |      |
| IgH <sup>I</sup> | TTCTAAGCCAGTCCACATGCTCTGTGTGA <b>ACTCCCT</b> CTGGCCCTGCTTAT           | 248  |
| Myc <sup>I</sup> | TTTCTGTACGGTTGTT <b>CGGGCGCAGCGCT</b> CGGCTGAACTGTGTTCTTGCC           | 1717 |
| 1212-23          | AATCTAGAGCTAGCGGCCGAGTTA <b>CGCT</b> CGGCTGAACTGTGTTCTTGCC            |      |
| IgH <sup>I</sup> | AATCTAGAGCTAGCGGCCGAGTTA <b>CGCTAGGGATAACAGGGTAAT</b> ATAG            | 9    |
| Myc <sup>I</sup> | CAGCGTCTCTCTAAGGCTGGGGAA <b>AACAG</b> AATTTAGAAAGGGGAAGGA             | 1854 |
| 1212-27          | TAGCGGCCGAGTTACGCT <b>TAGGGAT</b> <b>AACAG</b> AATTTAGAAAGGGGAAGGA    |      |
| IgH <sup>I</sup> | TAGCGGCCGAGTTACGCT <b>TAGGGAT</b> <b>AACAGGGTAAT</b> ATAGCCACCCATCC   | -2   |
| Myc <sup>I</sup> | CTCTTGCTCGCGCTAGTCCTTT <b>CC</b> TTTCTGTACGGTTGTT <b>CGGGCGC</b>      | 1690 |
| 1212-28          | TTCTTAATTAATCTAGAGCTAGCG <b>CC</b> TTTCTGTACGGTTGTT <b>CGGGCGC</b>    |      |
| IgH <sup>I</sup> | TTCTTAATTAATCTAGAGCTAGCG <b>CC</b> GCAGTTACGCTAGGGATAACAGG            | 20   |

**Table S3. Translocation breakpoints from Myc<sup>l/+</sup> B cells infected with I-SceI.** 50 nucleotides surrounding each breakpoint are shown, with the homology to germline sequence indicated by vertical bars. I-SceI site sequences are highlighted in blue, insertions are green, microhomologies are yellow. Shaded in light grey are extended microhomologies if single nucleotides gaps are tolerated. In 5 cases the breakpoint falls in the repetitive switch  $\mu$  region, but cannot be precisely mapped. Numbers on the right indicate the distance in base pairs between the breakpoint and the center of the I-SceI site at the Myc<sup>l</sup> allele. The top 12 sequences are from der12, the remaining 3 from der15 translocations.

|                  |                                                        |    |
|------------------|--------------------------------------------------------|----|
| Myc <sup>l</sup> | CCCTTGGGCCGGCCATTACCCTGTTATCCCTACAGGGCGTCTTCCCTCTC     | -2 |
| 108A             | <br>CCCTTGGGCCGGCCATTACCCTGTTGAGCTGAGCTGGGTGAGCTGAGCTG |    |
| IgH              | GGCCTGCTGCTGGGCTGGCATAGCTGAGTTGAACTTAAATGAGGAAGGCT     |    |
| Myc <sup>l</sup> | GCCCTTGGGCCGGCCATTACCCTGTTATCCCTACAGGGCGTCTTCCCTCT     | -1 |
| 112A             | <br>GCCCTTGGGCCGGCCATTACCCTGTAGTTGGGTGAGCTGAGCTGAGCTG  |    |
| IgH              | AGCTGGAGTGAGCTGAGCTGAGGTGAAC TGGGTGAGCTGAGCTGAGCTG     |    |
| Myc <sup>l</sup> | CGCCCTTGGGCCGGCCATTACCCTGTTATCCCTACAGGGCGTCTTCCCTCT    | 0  |
| 113A             | <br>CGCCCTTGGGCCGGCCATTACCCTGAGCTGGGCTAGCTGACATGGATTAT |    |
| IgH              | AGCTGGGATGAGGTAGGCTGGGATGAGCTGGGCTAGCTGACATGGATTAT     |    |
| Myc <sup>l</sup> | CGCCCTTGGGCCGGCCATTACCCTGTTATCCCTACAGGGCGTCTTCCCTCT    | 0  |
| 114A             | <br>CGCCCTTGGGCCGGCCATTACCCTGAGCTGGGTGAGCTGAGCTGAGCT   |    |
| IgH              | GAGCTGAGCTGAGCTGGGTGAGCTGAGCTGGGTGAGCTGAGCTGAGCT       |    |
| Myc <sup>l</sup> | CCCTTGGGCCGGCCATTACCCTGTTATCCCTACAGGGCGTCTTCCCTCTC     | -2 |
| 116A             | <br>CCCTTGGGCCGGCCATTACCCTGTTCTGAGCTGGGTGAGCTGAGCTGA   |    |
| IgH              | GGTGAAGCTGAGCTGGGTGAGCTGAGCTGGGTGAGCTGAGCTGA           |    |
| Myc <sup>l</sup> | CATTATACGAAGTTATGAATTCGCCCTTGGGCCGGCCATTACCCTGTTAT     | 22 |
| 1034-4           | <br>CATTATACGAAGTTATGAATTCGCCAGCTGAGCTGAGCTGAGCTGAGCTG |    |
| IgH              | S $\mu$ -TGAGCTGAGCTGAGCTGAGCTGAGCTG                   |    |
| Myc <sup>l</sup> | GCCCTTGGGCCGGCCATTACCCTGTTATCCCTACAGGGCGTCTTCCCTCT     | -1 |
| 1034-8           | <br>GCCCTTGGGCCGGCCATTACCCTGTGGGTGAGCTGGGTAAAGCTGAGCTG |    |
| IgH              | S $\mu$ -TGGGTGAGCTGGGTAAAGCTGAGCTG                    |    |
| Myc <sup>l</sup> | GGTGTAAATTAAGAATTCGGATCCGATTCGAGCTCGGAAAGCTTATAAC      | 83 |
| 1034-9           | <br>GGTGTAAATTAAGAATTCGGATCCGAGCTGAGCTGANCTGGGTAAAGCTG |    |
| IgH              | S $\mu$ -GTGAGCTGAGCTGAGCTGGGTAAAGCTG                  |    |
| Myc <sup>l</sup> | ATGAATTCGCCCTTGGGCCGGCCATTACCCTGTTATCCCTACAGGGCGTC     | 7  |
| 1034-10          | <br>ATGAATTCGCCCTTGGGCCGGCCATTCCCAGCTCAGCCAGCTCAGCTC   |    |
| IgH              | S $\mu$ -CACCCAGCTCAGCCAGCTCAGCTC                      |    |
| Myc <sup>l</sup> | TTCGCCCTTGGGCCGGCCATTACCCTGTTATCCCTACAGGGCGTCTTCCC     | 1  |
| 1108-10          | <br>TTCGCCCTTGGGCCGGCCATTACCCTAGCTGAGCTGGGTGAGCTGAGCT  |    |
| IgH              | S $\mu$ -TGAGCTGAGCTGGGTGAGCTGAGCT                     |    |

**Cell, Volume 135**

|                  |                                                     |    |
|------------------|-----------------------------------------------------|----|
| Myc <sup>I</sup> | CGCCCTTGGGCCGGCCATTACCCTGTTATCCCTACAGGGCGTCTTCCCTC  | -1 |
| 1108-11          | CGCCCTTGGGCCGGCCATTACCCTGTTCCAGCTCAGCCCAGCTCAGCCCAG |    |
| IgH              | GAGCTGAGCTGAGCTGGGGTGAGCTGCCAGCTCAGCCCAGCTCAGCCCAG  |    |
| Myc <sup>I</sup> | TCGTATAGCATACATTATACGAAGTTATGAATTCGCCCTTGGGCCGGCCA  | 32 |
| 1108-12          | TCGTATAGCATACATTATACGAAGTTGGACTCAACTGGGCTGGCTGATGG  |    |
| IgH              | CTGGATGATCTGGTGTAGGGTGATCTGGACTCAACTGGGCTGGCTGATGG  |    |
| Myc <sup>I</sup> | CCTCGGCGGGGAGAGGGAAGACGCCCTGTAGGGATAACAGGGTAATGGCC  | 13 |
| 11-10-13         | CCTCGGCGGGGAGAGGGAAGACGCCATCTCAGCTCATCTGTGCTTTTITAG |    |
| IgH              | TAGAAGCACTCAGAGAAGCCACCCATCTCAGCTCAGCTGTGCTTTTITAG  |    |
| Myc <sup>I</sup> | GGGAGAGGGAAGACGCCCTGTAGGGATAACAGGGTAATGGCCGGCCCAAG  | 5  |
| 11-10-17         | GGGAGAGGGAAGACGCCCTGTAGGGGTTTTCTATAAAAACTAAAAACATC  |    |
| IgH              | AGTTGTAGATCAAGAATGTAGTAGTGTTTTTCTATAAAAACTAAAAACATC |    |
| Myc <sup>I</sup> | CGGCGGGGAGAGGGAAGACGCCCTGTAGGGATAACAGGGTAATGGCCGGC  | 10 |
| 681-6            | CGGCGGGGAGAGGGAAGACGCCCTGGGGTCAGCTGAGCAAGAGTGAGTAG  |    |
| IgH              | GAACTGAGCTGTGTGAGCTGAGCTGGGGTCAGCTGAGCAAGAGTGAGTAG  |    |

**Table S4. Translocation breakpoints from uninfected wild type B cells.** 50 nucleotides surrounding each breakpoint are shown, with the homology to germline sequence indicated by vertical bars. Insertions are green, microhomologies are yellow. Shadowed in light grey are extended microhomologies if single nucleotides gaps are tolerated. In 4 cases the breakpoint falls in the repetitive switch  $\mu$  region, but cannot be precisely mapped. The top 5 sequences are from der12, the remaining 6 from der15 translocations.

|       |                                                       |
|-------|-------------------------------------------------------|
| Myc   | CTAGCGCAGTGAGGAGAAGCAAAATTGGGACAGGGATGTGACCGATTTCGT   |
| 931-1 | TCAGCTCACCCAGCTCAGCTCACCTGGGACAGGGATGTGACCGATTTCGT    |
| IgH   | TCAGCTCACCCAGCTCAGCTCACCC - S $\mu$                   |
| Myc   | CAGACTCTGGTGGTCTTTCCCTGTGTTCCTTCTGCGTCTTGAATGTAGCGG   |
| 931-4 | TCACCTAGNTCAGCTCACCCAGCTCTTCTGCGTCTTGAATGTAGCGG       |
| IgH   | TCACCTAGCTCAGCTCACCCAGCTCAG - S $\mu$                 |
| Myc   | TGAGGGGTCAAACCGGAGGTTCGCTTCGTGGTGGCCAAAGAAAGCCCTTG    |
| 931-6 | AAGCACTCAGAGAAGCCACCCATCTCGTGGTGGCCAAAGAAAGCCCTTG     |
| IgH   | AAGCACTCAGAGAAGCCACCCATCTCAGCTCAGCTGTGCTTTTATAGAGC    |
| Myc   | TTTGGGAGCGAGAAGGCTCCGTAGCTTCTGACTTACCAGTCTCTGAGAGG    |
| 931-7 | TCACCTAGCTCAGCTCACCCAGCTTCTGACTTACCAGTCTCTGAGAGG      |
| IgH   | TCACCTAGCTCAGCTCACCCAGCTCA - S $\mu$                  |
| Myc   | TCGTTCTGTTGGTGGCCAAAGAAAGCCCTTGAATCCTGAGGTCTTTGGAG    |
| 931-8 | CAGCTCAGCTCAGCTCAGCCAGCTCTTGAATCCTGAGGTCTTTGGAG       |
| IgH   | CAGCTCAGCTCAGCTCAGCCAGCTCAGCTCAGCTCACCCAGCTCAGCT      |
| Myc   | TTCTGACTTACCAGTCTCTGAGAGGGCATTAAATTTACAGCTTGGTGCAT    |
| 237   | TTCTGACTTACCAGTCTCTGAGAGGATGCATCGGATACTGTATAAAATGCT   |
| IgH   | GTGCCCACTCCACTCTTTGTCCCTATGCATCGGATACTGTATAAAATGCT    |
| Myc   | CAGTTAATTCATGCTGCGCTATTACGTTTACACCCCGAGCCGAGTAC       |
| 268   | CAGTTAATTCATGCTGCGCTATTACCCAGCTCAGCTCACCTAGCTCAGC     |
| IgH   | CTCACCCAGCTTAGCTCAGCTCACCCAGCTCAGCTCACCTAGCTCAGC      |
| Myc   | AAACCCCGTAAGCACAGATCTGGTGGTCTTTCCCTGTGTCTTTCTGCG      |
| 274   | AAACCCCGTAAGCACAGATCTGGTGGTCTTTCTCAATTCTGTACAGCTGTGGC |
| IgH   | TGGCCTCAACTGCAGGTCTTATTCTTTCTCAATTCTGTACAGCTGTGGC     |
| Myc   | GGTTAGGACAGTCTTTCTTCCATTCTGTGCTTTTGACACTTTTCTCAAG     |
| 276   | GGTTAGGACAGTCTTTCTTCCATTCTGTGCTTTTGACACTTTTCTCAAG     |
| IgH   | GGTCCCTGAAGCTGATCTGCCAGGATCCGCCCAATCTAGCTGATTTGTC     |
| Myc   | TCTCTGAGAGGGCATTAAATTTCAAGCTTGGTGCATTTCTGACAGCCTGG    |
| 278   | TCTCTGAGAGGGCATTAAATTTCAACTCATTAACCACATGAGTNGTA       |
| IgH   | GAAGTACATTTACTGGCAACTTCAATTCATTAACCACATGAGTNGTA       |
